# Supplementary material for: Development and comparison of methods using MS scan and selective ion monitoring modes for a wide range of airborne VOCs
Source: Royal Society of Chemistry journal article supplement (doi:10.1039/b607042f), 2006-01-01
Supplement: b607042f.pdf [file b607042f.pdf]

## SUPPLEMENTARY INFORMATION

(Jia et al., “Development and Comparison...”)

Chemical properties of the 94 target compounds and 2 internal standard compounds (highlighted). MW = molecular weight; BP = boiling point; RT = retention time; TI = target ion; QI = qualifier ion. Sources: refs <sup>i</sup> and <sup>ii</sup>.

| Compound                       | CAS No.    | BP (°C) | RT (min) | TI (m/z) | QI (m/z) | Compound                        | CAS No.   | BP (°C) | RT (min) | TI (m/z) | QI (m/z) |
|--------------------------------|------------|---------|----------|----------|----------|---------------------------------|-----------|---------|----------|----------|----------|
| <b>Fluorobenzene</b>           | 462-06-6   | 84.7    | 7.91     | 96       | 70       | p-Xylene                        | 106-42-3  | 138.4   | 16.42    | 91       | 106      |
| 1,3-Butadiene                  | 106-99-0   | -4.4    | 1.70     | 54       | 39,37    | m-Xylene                        | 108-38-3  | 139.1   | 16.42    | 91       | 106      |
| 1,2-Dichloroethylene (trans,E) | 156-60-5   | 47.7    | 4.81     | 61       | 96       | Bromoform                       | 75-25-2   | 149.2   | 16.93    | 173      | 252      |
| Methyl t-butyl ether           | 1634-04-4  | 55.2    | 5.18     | 73       | 57       | Styrene                         | 100-42-5  | 145.2   | 17.26    | 104      | 78       |
| 1,1-Dichloroethane             | 75-34-3    | 57.3    | 5.18     | 63       | 83       | o-Xylene                        | 95-47-6   | 144.4   | 17.31    | 91       | 106      |
| Propanenitrile                 | 107-12-0   | 97.4    | 5.50     | 54       | 55       | n-Nonane                        | 111-84-2  | 150.8   | 17.78    | 43       | 41       |
| 1,2-Dichloroethylene (Cis, Z)  | 156-59-2   | 60.5    | 5.98     | 61       | 96       | 1,1,2,2-Tetrachloroethane       | 79-34-5   | 145.1   | 18.21    | 83       | 131, 168 |
| 2-Butanone                     | 78-93-3    | 79.6    | 6.03     | 43       | 72, 57   | 1,2,3-Trichloropropane          | 96-18-4   | 156.9   | 18.45    | 75       | 110      |
| 2,2-Dichloropropane            | 594-20-7   | 69.3    | 6.13     | 77       | 97, 41   | Isopropylbenzene                | 98-82-8   | 152.4   | 18.57    | 105      | 120      |
| Bromochloromethane             | 74-97-5    | 68.1    | 6.20     | 49       | 130      | Bromobenzene                    | 108-86-1  | 156.1   | 18.67    | 77       | 156      |
| Chloroform                     | 67-66-3    | 61.2    | 6.27     | 83       | 47       | 1,4-Dichlor-2-butene (trans, E) | 110-57-6  | 156.1   | 18.85    | 75       | 89, 124  |
| Methyl acrylate                | 96-33-3    | 80.2    | 6.42     | 55       | 85,27    | α-Pinene                        | 7785-70-8 | 155.0   | 18.87    | 93       | 77, 105  |
| Ethyl acetate                  | 141-78-6   | 77.1    | 6.53     | 43       | 45       | 2-Chlorotoluene                 | 95-49-8   | 159.2   | 19.48    | 91       | 126      |
| Tetrahydrofuran                | 109-99-9   | 64.9    | 6.73     | 42       | 72       | n-Propylbenzene                 | 103-65-1  | 159.2   | 19.64    | 91       | 120      |
| 1,1,1-Trichloroethane          | 71-55-6    | 74.1    | 6.94     | 97       | 61, 117  | 4-Chlorotoluene                 | 106-43-4  | 162.5   | 19.70    | 91       | 126      |
| Cyclohexane                    | 110-82-7   | 80.7    | 7.29     | 56       | 84       | 4-ethyl toluene                 | 622-96-8  | 162.0   | 19.98    | 105      | 120      |
| 1,2-Dichloroethane             | 107-06-2   | 83.4    | 7.11     | 62       | 49, 98   | 1,3,5-Trimethylbenzene          | 108-67-8  | 164.7   | 20.16    | 105      | 120      |
| Butyl chloride                 | 109-69-3   | 78.4    | 7.14     | 56       | 41,27    | Pentachloroethane               | 76-01-7   | 159.9   | 20.35    | 167      | 117      |
| 1,1-Dichloropropene            | 563-58-6   | 76.5    | 7.25     | 75       | 110      | 2-ethyl toluene                 | 611-14-3  | 165.2   | 20.55    | 105      | 120      |
| Benzene                        | 71-43-2    | 80.1    | 7.35     | 78       | 50       | Phenol                          | 108-95-2  | 181.8   | 21.04    | 94       | 66       |
| Carbontetrachloride            | 56-23-5    | 76.6    | 7.36     | 117      | 82       | tert-Butylbenzene               | 98-06-6   | 169.2   | 21.01    | 119      | 91, 134  |
| Chloroacetonitrile             | 107-14-2   | 124.0   | 8.51     | 75       | 48       | 1,2,4-Trimethylbenzene          | 95-63-6   | 169.4   | 21.02    | 105      | 120      |
| 1,2-Dichloropropane            | 78-87-5    | 96.4    | 8.76     | 63       | 76, 41   | n-Decane                        | 124-18-5  | 174.2   | 21.36    | 57       | 43       |
| Trichloroethylene              | 79-01-6    | 87.0    | 8.77     | 130      | 95       | 1,3-Dichlorobenzene             | 541-73-1  | 173.1   | 21.61    | 146      | 111, 75  |
| n-Heptane                      | 142-82-5   | 98.4    | 8.90     | 43       | 71       | 1,4-Dichlorobenzene             | 106-46-7  | 174.1   | 21.37    | 146      | 111, 75  |
| Dibromomethane                 | 74-95-3    | 97.0    | 8.83     | 174      | 93       | sec-Butylbenzene                | 135-98-8  | 173.3   | 21.62    | 105      | 134      |
| 2-Nitropropane                 | 79-46-9    | 120.3   | 9.15     | 43       | 41,27    | 1,2,3-trimethyl benzene         | 526-73-8  | 176.1   | 21.98    | 105      | 120      |
| Bromodichloromethane           | 75-27-4    | 90.0    | 9.10     | 83       | 129      | p-Isopropyltoluene              | 99-87-6   | 177.1   | 22.11    | 119      | 134      |
| 2,5-Dimethyl furan             | 625-86-5   | 93.0    | 9.32     | 96       | 43       | d-Limonene                      | 5989-27-5 | 176.5   | 22.24    | 68       | 93, 136  |
| Methyl cyclohexane             | 108-87-2   | 100.9   | 9.69     | 83       | 55       | 1,2-Dichlorobenzene             | 95-50-1   | 180.4   | 22.35    | 146      | 111,75   |
| Methyl methacrylate            | 80-62-6    | 100.3   | 9.80     | 41       | 69, 100  | n-Butylbenzene                  | 104-51-8  | 183.3   | 23.15    | 91       | 134      |
| 1,1-Dichloro-2-propanone       | 513-88-2   | 120.0   | 10.51    | 43       | 83       | o-Cresol                        | 95-48-7   | 191.0   | 23.24    | 108      | 79,90    |
| 1,3-Dichloropropene (Cis, Z)   | 10061-01-5 | 104.0   | 10.88    | 75       | 110      | Hexachloroethane                | 67-72-1   | 186.9   | 23.58    | 166      | 201, 117 |
| Methyl isobutyl ketone         | 108-10-1   | 116.5   | 11.14    | 43       | 58, 85   | p-Cresol                        | 106-44-5  | 202.0   | 23.96    | 107      | 77       |
| Toluene                        | 108-88-3   | 110.6   | 11.93    | 91       | 92       | m-Cresol                        | 108-39-4  | 202.3   | 23.96    | 107      | 77       |
| 1,3-Dichloropropene (Trans, E) | 10061-02-6 | 112.0   | 12.16    | 75       | 110, 49  | 1,2-Dibromo-3-chloropropane     | 96-12-8   | 196.0   | 23.97    | 157      | 75       |
| 1,1,2-Trichloroethane          | 79-00-5    | 113.9   | 12.33    | 97       | 83, 61   | Nitrobenzene                    | 98-95-3   | 210.8   | 24.11    | 123      | 77,51    |
| 1,3-Dichloropropane            | 142-28-9   | 120.4   | 12.94    | 76       | 41       | n-Undecane                      | 1120-21-4 | 195.9   | 24.61    | 57       | 43       |
| <b>p-Bromofluorobenzene</b>    | 460-00-4   | 152.0   | 18.52    | 174      | 95       | 1,2,4-Trichlorobenzene          | 120-82-1  | 213.0   | 26.84    | 180      | 145, 109 |
| Dibromochloromethane           | 124-48-1   | 119.5   | 13.21    | 129      | 127      | Naphthalene                     | 91-20-3   | 218.0   | 27.01    | 128      | 102      |
| Ethyl methacrylate             | 97-63-2    | 117.0   | 13.34    | 69       | 99       | n-Dodecane                      | 112-40-3  | 216.3   | 27.60    | 57       | 43       |
| 2-Hexanone                     | 591-78-6   | 127.7   | 13.42    | 43       | 58, 71,  | 1,2,3-Trichlorobenzene          | 87-61-6   | 218.6   | 27.88    | 180      | 145      |
| n-Octane                       | 111-65-9   | 125.7   | 13.66    | 43       | 85       | Hexachlorobutadiene             | 87-68-3   | 215.0   | 28.05    | 225      | 260, 190 |
| 1,2-Dibromoethane              | 106-93-4   | 131.4   | 13.65    | 107      | 109, 27  | n-Tridecane                     | 629-50-5  | 235.5   | 30.44    | 57       | 43       |
| Tetrachloroethene              | 127-18-4   | 121.3   | 13.80    | 166      | 129      | n-Tetradecane                   | 629-59-4  | 253.6   | 32.78    | 57       | 43       |
| Chlorobenzene                  | 108-90-7   | 131.7   | 15.40    | 112      | 77       | n-Pentadecane                   | 629-62-9  | 270.7   | 34.21    | 57       | 43       |
| 1,1,1,2-Tetrachloroethane      | 630-20-6   | 130.5   | 15.64    | 131      | 117, 95  | n-Hexadecane                    | 544-76-3  | 286.9   | 35.30    | 57       | 43       |
| Ethylbenzene                   | 100-41-4   | 136.2   | 16.09    | 91       | 106      | n-Heptadecane                   | 629-78-7  | 302.2   | 36.22    | 57       | 43       |

<sup>i</sup> C. L. Yaws, *Chemical Properties Handbook* [electronic resource]: *physical, thermodynamic, environmental, transport, safety, and health related properties for organic and inorganic chemicals*, McGraw-Hill, New York, 2003.

<sup>ii</sup> D. R. Lide, *CRC Handbook of Chemistry and Physics*, CRC Press, Boca Raton, FL, 2005.
